# Supplementary material
Source: PubMed Central journal article supplement (PMC3696022)
Supplement: NIHMS472789-supplement-01.pdf [file NIHMS472789-supplement-01.pdf]

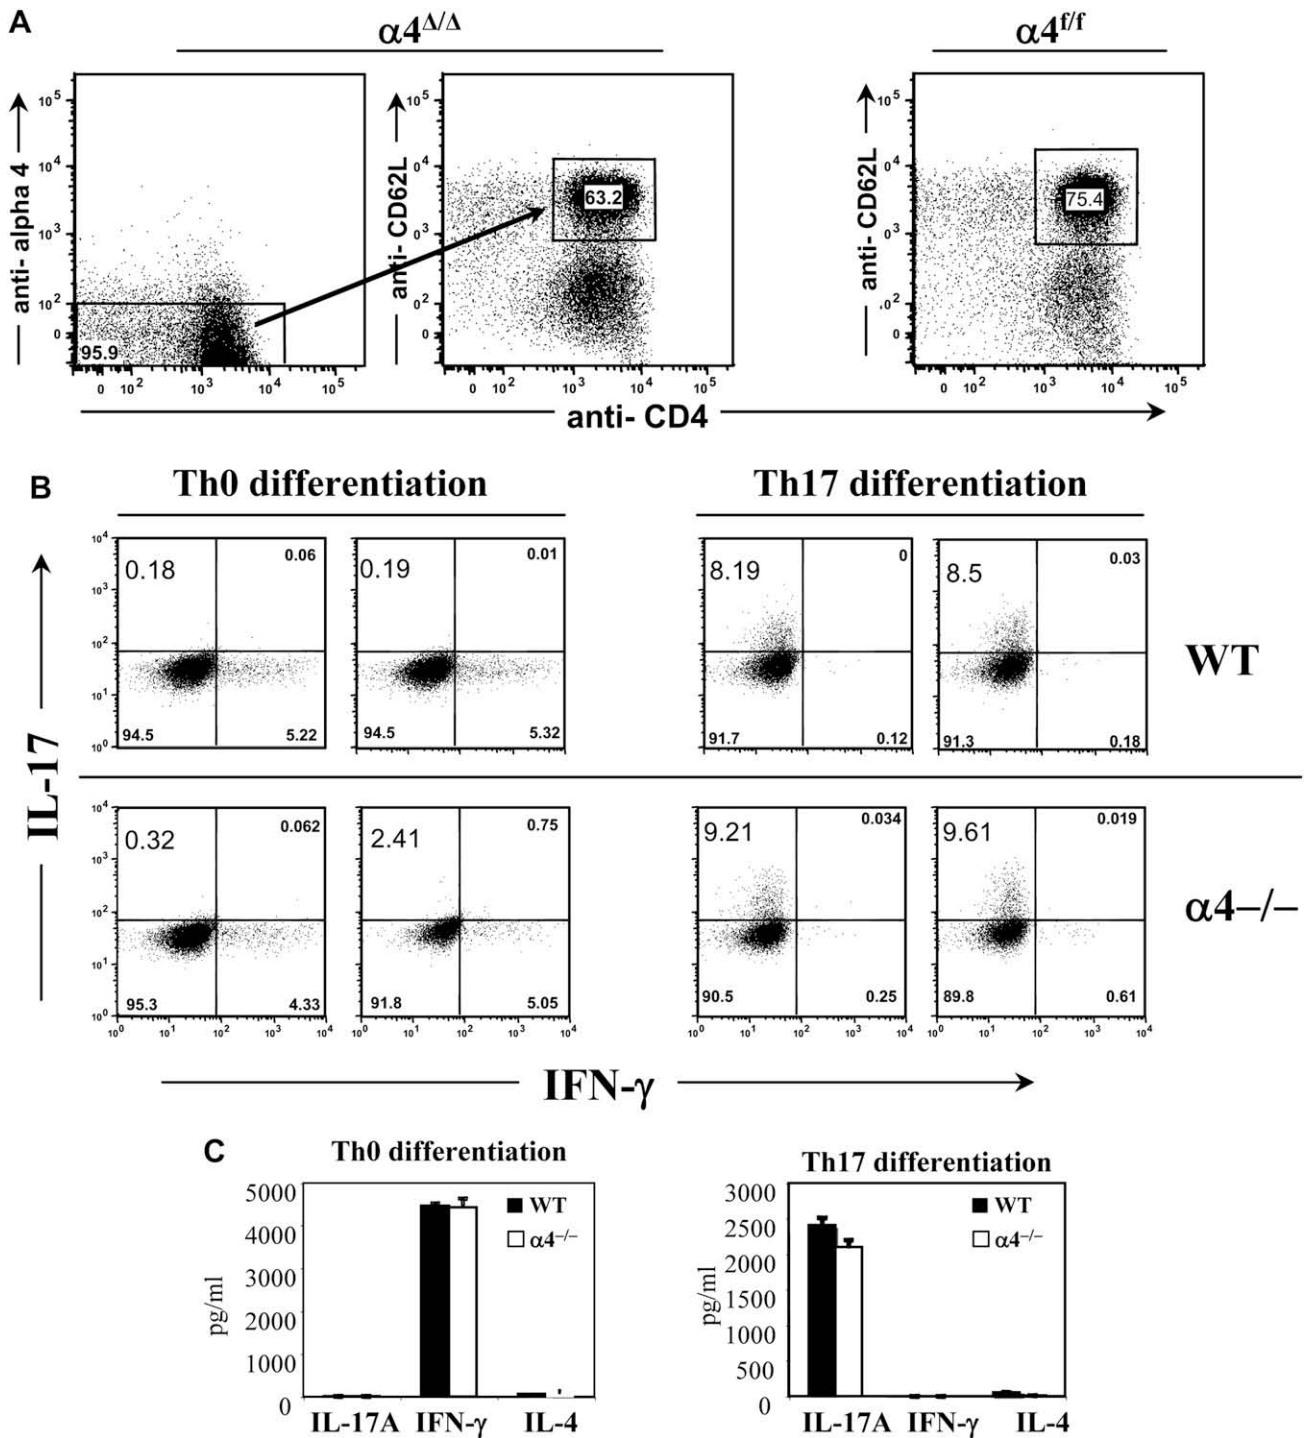

**Supplementary Figure 1.** Purified  $CD4^+/CD62L^+/\alpha 4^-$  and  $CD4^+/CD62L^+/\alpha 4^+$  cells from spleens (A) were cultured in vitro under Th0 and Th17 differentiation conditions (see Materials and Methods). (B) Numbers in quadrants indicate the percentage of cells with intracellular interleukin (IL)-17 or interferon- $\gamma$  (IFN- $\gamma$ ). There are no significant differences between WT and alpha4 deficient in the proportion of cells expressing IL-17 or (C) in the levels of IL-17 in the supernatants analyzed for IFN- $\gamma$ , IL-17A, and IL-4 by enzyme-linked immunosorbent assay.

**Supplementary Table 1.** Total numbers of nucleated cells (x10E6) in bone marrow, blood, airways, and lung (data for Fig. 2)

|                                   | Mononuclear           |                      | Neutrophils          | Eosinophils           | Total                  |
|-----------------------------------|-----------------------|----------------------|----------------------|-----------------------|------------------------|
| <b>BM/femur</b>                   |                       |                      |                      |                       |                        |
| WT + alum                         | 19.087 ± 2.56         |                      | 10.459 ± 1.08        | 1.229 ± 3.38          | 30.775 ± 2.36          |
| WT + OVA                          | 16.038 ± 1.07         |                      | 19.718 ± 4.96        | 9.394 ± 2.28          | 45.15 ± 1.15           |
| $\alpha 4^{\Delta/\Delta}$ + alum | 20.371 ± 3.39         |                      | 14.714 ± 3.97        | 1.914 ± 0.46          | 37 ± 5.91              |
| $\alpha 4^{\Delta/\Delta}$ + OVA  | 33.734 ± 5.51         |                      | 29.209 ± 5.93        | 8.557 ± 1.75          | 71.5 ± 7.94            |
| $\beta 2^{-/-}$ + alum            | 20.077 ± 3.78         |                      | 8.874 ± 5.06         | 3.189 ± 11.86         | 32.14 ± 4.98           |
| $\beta 2^{-/-}$ + OVA             | <b>26.180 ± 7.05</b>  |                      | <b>22.637 ± 8.53</b> | <b>12.027 ± 6.97</b>  | <b>60.845 ± 3.08</b>   |
| <b>PB/2 ml</b>                    | Lymphocytes           | Monocytes            | Basophils            |                       |                        |
| WT + alum                         | 4.231 ± 1.12          | 0.529 ± 0.07         | 0.132 ± 0.07         | 3.487 ± 1.96          | 8.95 ± 0.35            |
| WT + OVA                          | 6.616 ± 0.86          | 2.214 ± 0.67         | 0.117 ± 0.06         | 5.062 ± 0.75          | 17.167 ± 2.32          |
| $\alpha 4^{\Delta/\Delta}$ + alum | 4.378 ± 0.94          | 3.079 ± 0.86         | 0.000 ± 0.00         | 4.247 ± 0.27          | 11.864 ± 1.07          |
| $\alpha 4^{\Delta/\Delta}$ + OVA  | <b>7.594 ± 1.07</b>   | <b>3.379 ± 0.83</b>  | 0.062 ± 0.07         | 5.050 ± 1.06          | <b>20.064 ± 8.65</b>   |
| $\beta 2^{-/-}$ + alum            | 34.425 ± 7.85         | 6.799 ± 1.58         | 0.258 ± 0.01         | 26.766 ± 8.86         | 74.1 ± 15.61           |
| $\beta 2^{-/-}$ + OVA             | <b>53.328 ± 7.97</b>  | <b>9.929 ± 2.97</b>  | <b>0.723 ± 0.97</b>  | <b>46.358 ± 11.96</b> | <b>133.814 ± 64.96</b> |
| <b>BALf/2lungs</b>                |                       |                      | Macrophages          |                       |                        |
| WT + alum                         | 0.003 ± 0.0001        | 0.030 ± 0.0007       | 0.023 ± 0.005        | 0.003 ± 0.0001        | 0.06 ± 0.003           |
| WT + OVA                          | 1.778 ± 0.265         | 0.466 ± 0.18         | 1.409 ± 0.067        | 1.040 ± 0.003         | 5.6 ± 0.48             |
| $\alpha 4^{\Delta/\Delta}$ + alum | 0.029 ± 0.0074        | 0.017 ± 0.001        | 0.009 ± 0.0001       | 0.005 ± 0.0001        | 0.06 ± 0.001           |
| $\alpha 4^{\Delta/\Delta}$ + OVA  | <b>0.566 ± 0.0076</b> | <b>0.130 ± 0.056</b> | <b>0.176 ± 0.007</b> | <b>0.379 ± 0.072</b>  | <b>1.314 ± 0.013</b>   |
| $\beta 2^{-/-}$ + alum            | 0.107 ± 0.007         | 0.594 ± 0.024        | 0.715 ± 0.023        | 0.041 ± 0.001         | 1.456 ± 0.039          |
| $\beta 2^{-/-}$ + OVA             | <b>0.658 ± 0.003</b>  | 0.258 ± 0.131        | 1.312 ± 0.244        | 0.941 ± 0.002         | 3.22 ± 0.78            |
| <b>LP/lung</b>                    |                       |                      |                      |                       |                        |
| WT + alum                         | 0.442 ± 0.012         | 0.192 ± 0.007        | 0.106 ± 0.004        | 0.356 ± 0.003         | 1.096 ± 0.023          |
| WT + OVA                          | 0.636 ± 0.154         | 0.158 ± 0.023        | 0.193 ± 0.023        | 0.476 ± 0.001         | 1.777 ± 0.164          |
| $\alpha 4^{\Delta/\Delta}$ + alum | 0.304 ± 0.054         | 0.108 ± 0.024        | 0.031 ± 0.0001       | 0.304 ± 0.001         | 0.747 ± 0.003          |
| $\alpha 4^{\Delta/\Delta}$ + OVA  | 0.525 ± 0.12          | 0.241 ± 0.001        | 0.388 ± 0.005        | 0.506 ± 0.002         | 2 ± 0.045              |
| $\beta 2^{-/-}$ + alum            | 0.226 ± 0.03          | 0.094 ± 0.0002       | 0.033 ± 0.0001       | 0.247 ± 0.007         | 0.6 ± 0.002            |
| $\beta 2^{-/-}$ + OVA             | 0.894 ± 0.002         | <b>0.486 ± 0.003</b> | 0.301 ± 0.002        | <b>2.287 ± 0.56</b>   | <b>4.66 ± 0.893</b>    |

Alum = aluminium sulfate; BM = bone marrow; LP = lung parenchyma; OVA = ovalbumin; PB = peripheral blood; WT = Wild Type, Numbers in bold indicate  $p < 0.01$ .

**Supplementary Table 2.** Concentrations of cytokines in bronchoalveolar lavage fluid and plasma post-ovalbumin in control,  $\alpha 4^{\Delta/\Delta}$ , and  $\beta^{-/-}$  mice and concentrations of ovalbumin-specific immunoglobulins E and G<sub>1</sub> in plasma of ovalbumin-treated mice (data for Fig. 4)

|                                | TNF- $\alpha$ (pg/mL)             | IFN- $\gamma$ (pg/mL)          | IL-2 (pg/mL)    | IL-4 (pg/mL)                      | IL-5 (pg/mL)                      | IL-13 (pg/mL)                       | Eotaxin (pg/mL)                      |
|--------------------------------|-----------------------------------|--------------------------------|-----------------|-----------------------------------|-----------------------------------|-------------------------------------|--------------------------------------|
| <b>BALf</b>                    |                                   |                                |                 |                                   |                                   |                                     |                                      |
| Control                        | 2307.6 $\pm$ 34.98                | 26.7 $\pm$ 12.09               | 42.6 $\pm$ 3.97 | 216.0 $\pm$ 2.17                  | 94.1 $\pm$ 2.87                   | 713.8 $\pm$ 29.27                   | 588.8 $\pm$ 65.44                    |
| $\alpha 4^{\Delta/\Delta}$     | <b>96.3 <math>\pm</math> 2.8</b>  | 22.5 $\pm$ 1.08                | 24.9 $\pm$ 2.99 | <b>96.4 <math>\pm</math> 3.89</b> | <b>40.7 <math>\pm</math> 7.09</b> | <b>474.6 <math>\pm</math> 90.59</b> | <b>298.4 <math>\pm</math> 16.8</b>   |
| $\beta^{-/-}$                  | <b>909 <math>\pm</math> 9.09</b>  | 26.4 $\pm$ 3.98                | 15.5 $\pm$ 1.5  | 214.2 $\pm$ 2.14                  | 67.5 $\pm$ 6.75                   | 855.8 $\pm$ 45.9                    | <b>274.2 <math>\pm</math> 5.29</b>   |
| <b>Plasma</b>                  |                                   |                                |                 |                                   |                                   |                                     |                                      |
| Control                        | 487.6 $\pm$ 8.47                  | 3.5 $\pm$ 1.6                  | 12.6 $\pm$ 1.98 | 149.2 $\pm$ 1.87                  | 47.2 $\pm$ 4.87                   | 875.5 $\pm$ 30.3                    | 645.6 $\pm$ 23.97                    |
| $\alpha 4^{\Delta/\Delta}$     | <b>296.6 <math>\pm</math> 2.8</b> | 4.4 $\pm$ 1.8                  | 18.3 $\pm$ 1.65 | <b>84.3 <math>\pm</math> 1.64</b> | <b>28.1 <math>\pm</math> 2.75</b> | 772.2 $\pm$ 118.3                   | <b>218.7 <math>\pm</math> 122.06</b> |
| $\beta^{-/-}$                  | 582.3 $\pm$ 5.53                  | 3.3 $\pm$ 1.05                 | 11.0 $\pm$ 0.64 | 113.6 $\pm$ 1.98                  | 27.2 $\pm$ 4.56                   | 535.1 $\pm$ 123                     | 403.5 $\pm$ 74.90                    |
| <b>IgE and IgG<sub>1</sub></b> |                                   |                                |                 |                                   |                                   |                                     |                                      |
|                                | IgE ( $\mu$ g/mL)                 | IgG <sub>1</sub> ( $\mu$ g/mL) |                 |                                   |                                   |                                     |                                      |
| Control                        | 25.9 $\pm$ 0.25                   | 15.9 $\pm$ 0.39                |                 |                                   |                                   |                                     |                                      |
| $\alpha 4^{\Delta/\Delta}$     | <b>8.5 <math>\pm</math> 0.43</b>  | 18.9 $\pm$ 0.42                |                 |                                   |                                   |                                     |                                      |
| $\beta^{-/-}$                  | 21.7 $\pm$ 2.65                   | 26.1 $\pm$ 1.91                |                 |                                   |                                   |                                     |                                      |

BALf = bronchoalveolar lavage fluid; IFN- $\gamma$  = interferon- $\gamma$ ; IgE = immunoglobulin E; IgG<sub>1</sub> = immunoglobulin G<sub>1</sub>; IL = interleukin; TNF- $\alpha$  = tumor necrosis factor- $\alpha$ .

Numbers in bold indicate  $p < 0.01$ .
